# Supplementary material for: Effect of Calcium Fortified Foods on Health Outcomes: A Systematic Review and Meta-Analysis
Source: MDPI journal article supplement (doi:10.3390/nu13020316), 2021-01-22

Figure S1a: Calcium intake (mg/day)

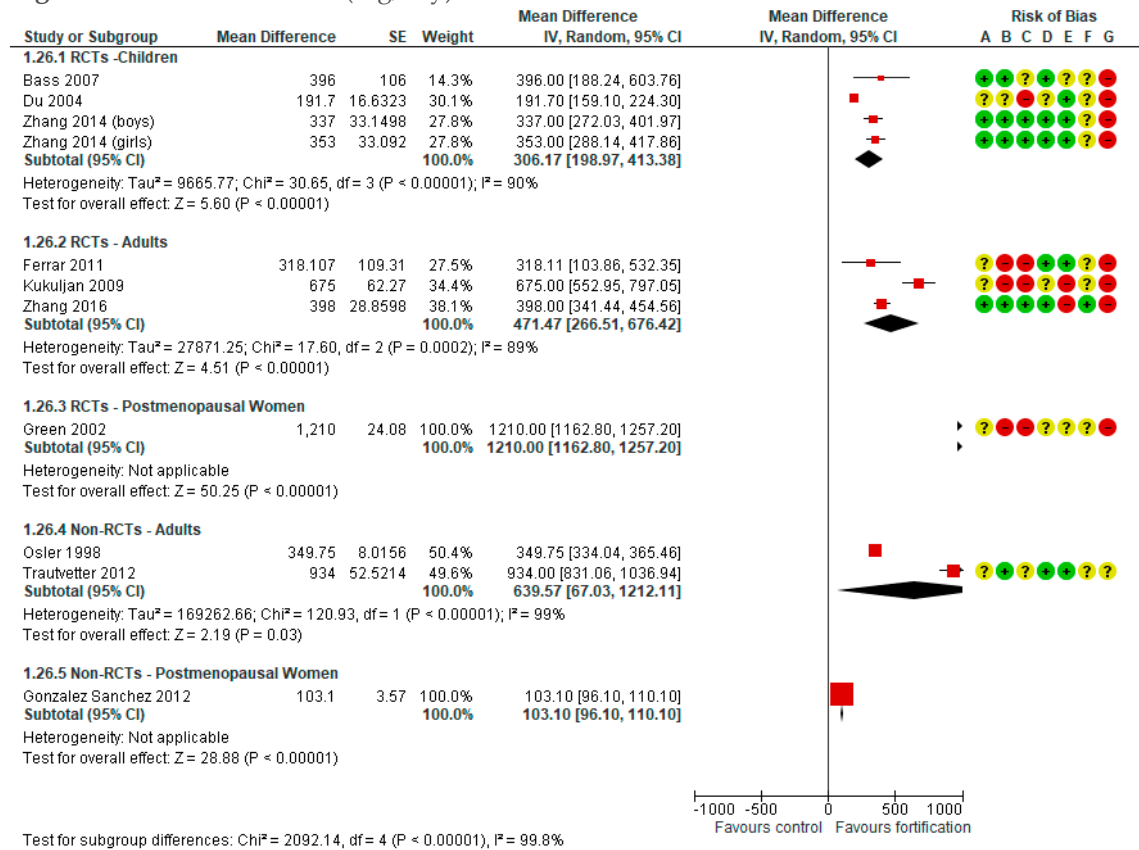

Figure S1b: Calcium intake by calcium fortification level (mg/day) reported in RCTs

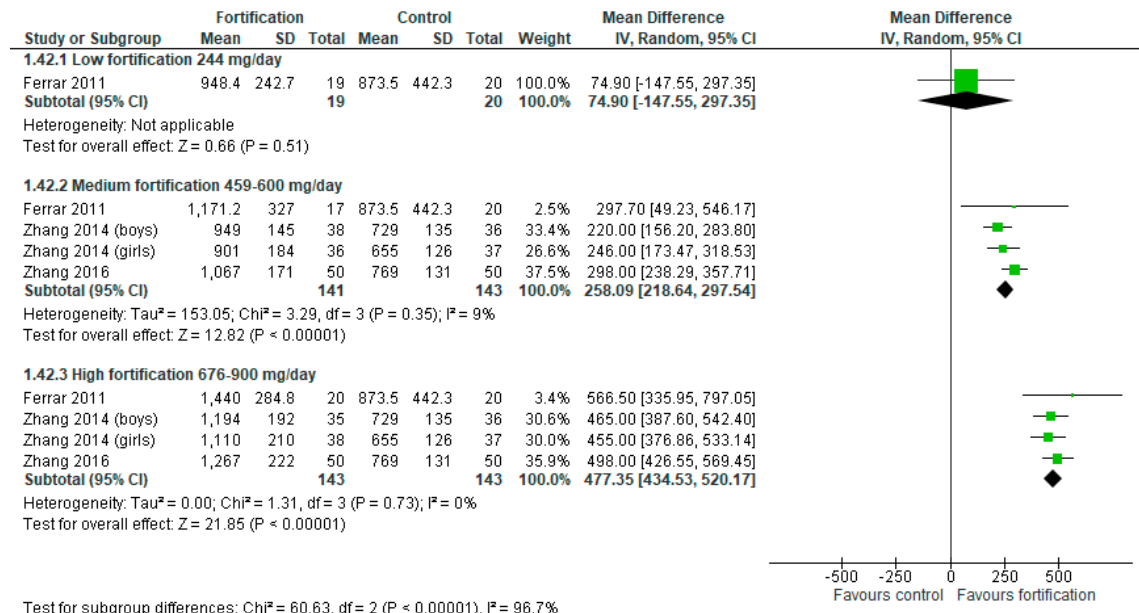

Figure S2: Weight (kg)

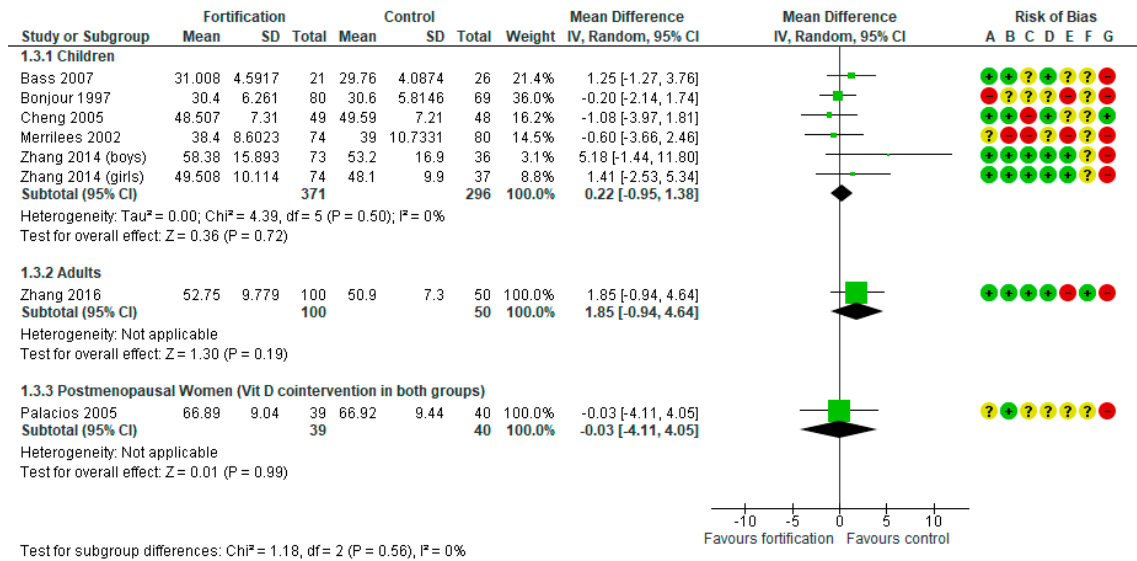

Figure S3: Height (cm)

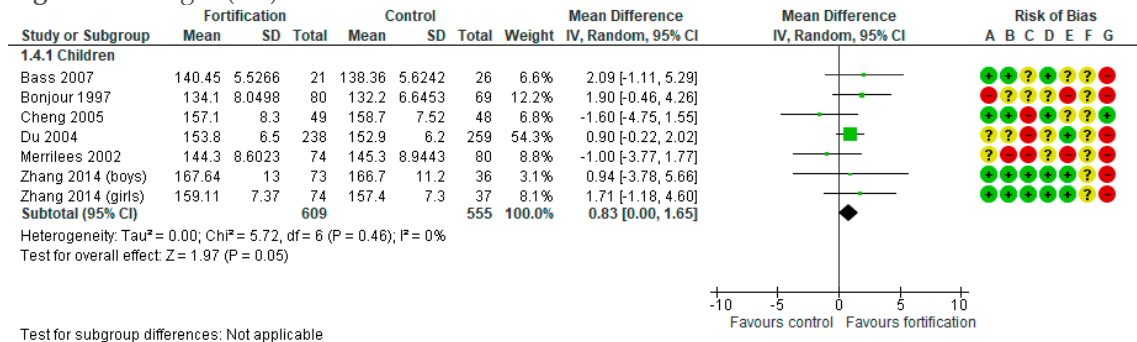

Figure S4: Parathyroid hormone (pmol/L)

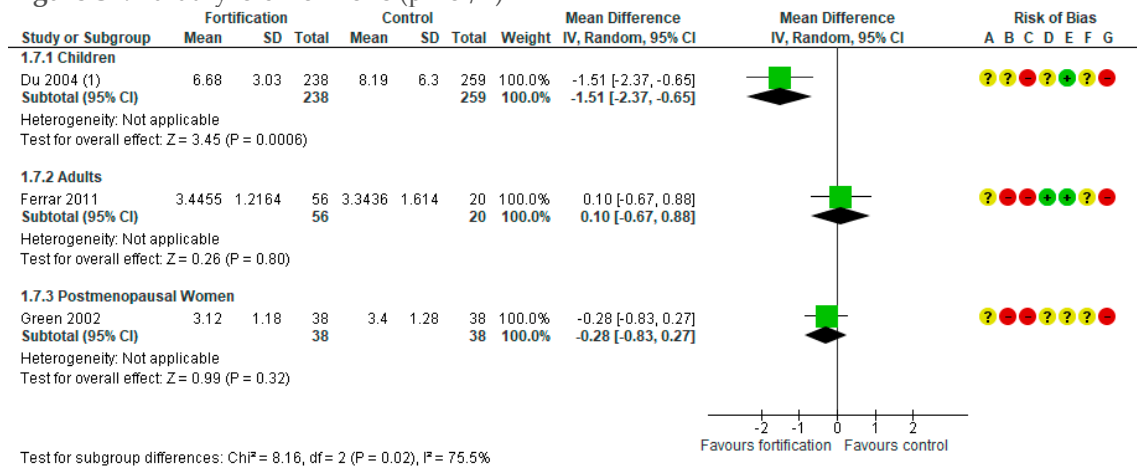

Figure S5: 25-hydroxy cholecalciferol (25 (OH) D3) (ng/mL)

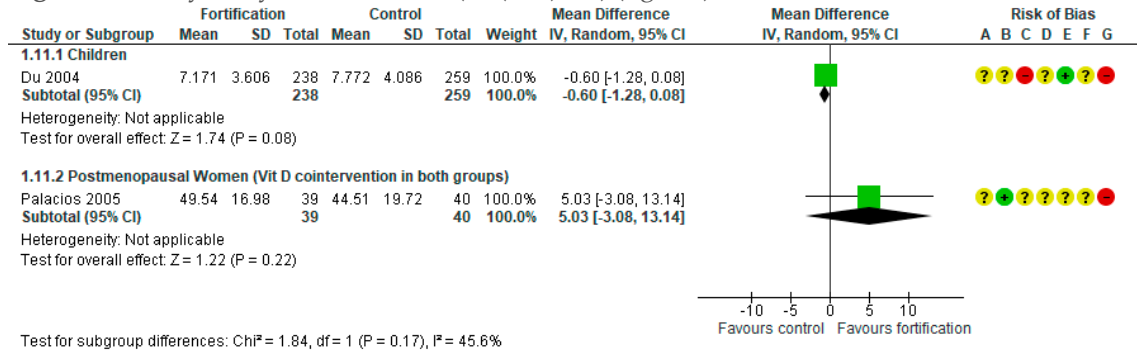

Figure S6: Serum Calcium (mg/dL)

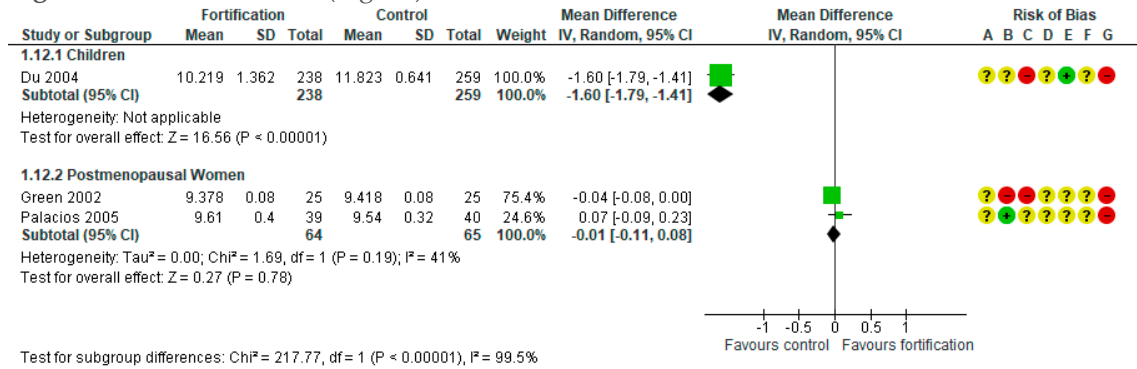

Figure S7: Urine Calcium / creatinine ratio

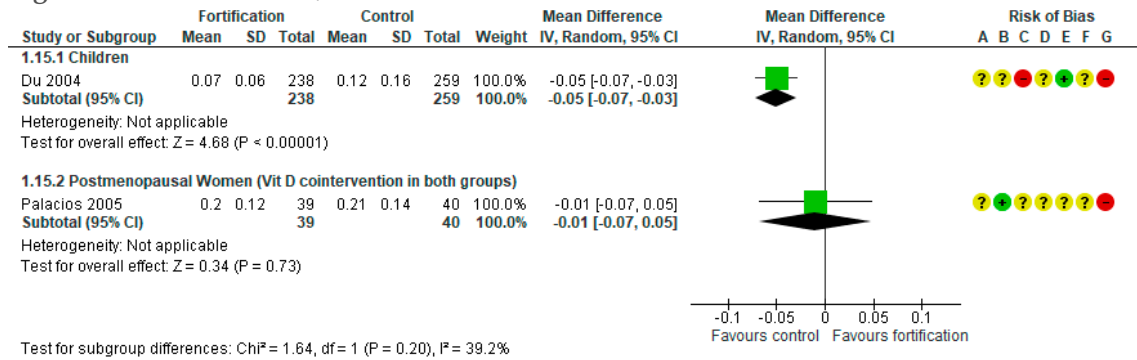

Figure S8: BMD Lumbar spine (g/cm<sup>2</sup>)

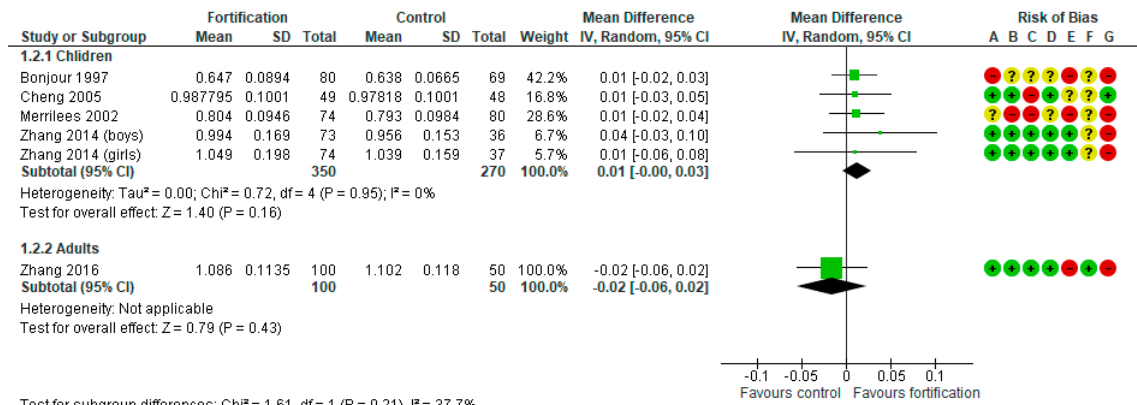

Figure S9: BMD Lumbar spine (g/cm<sup>2</sup>)

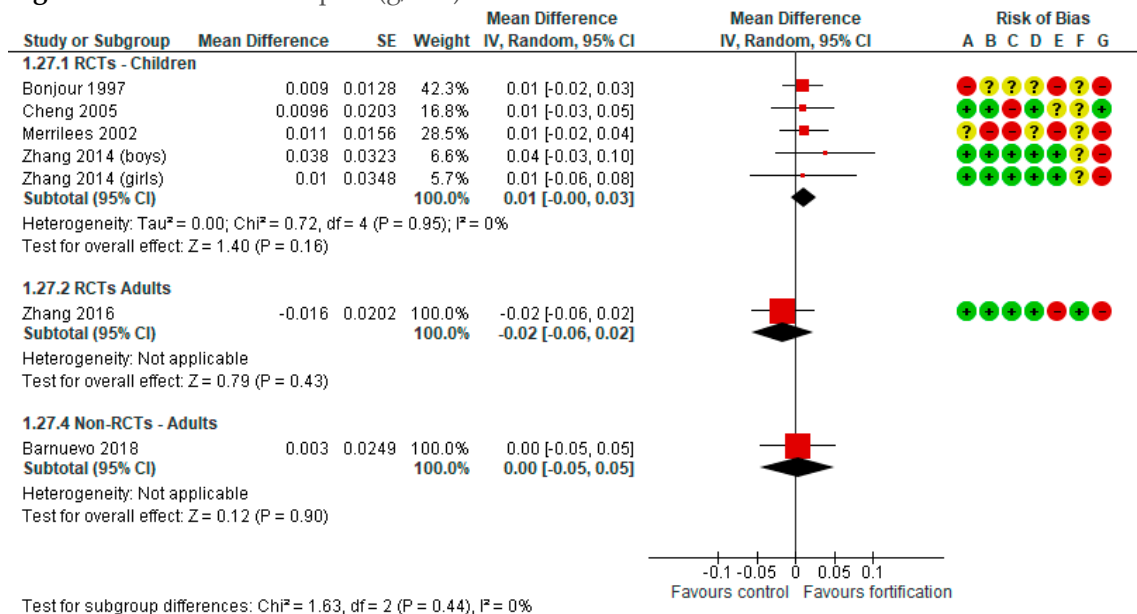

Figure S10: BMD hip (g/cm<sup>2</sup>)

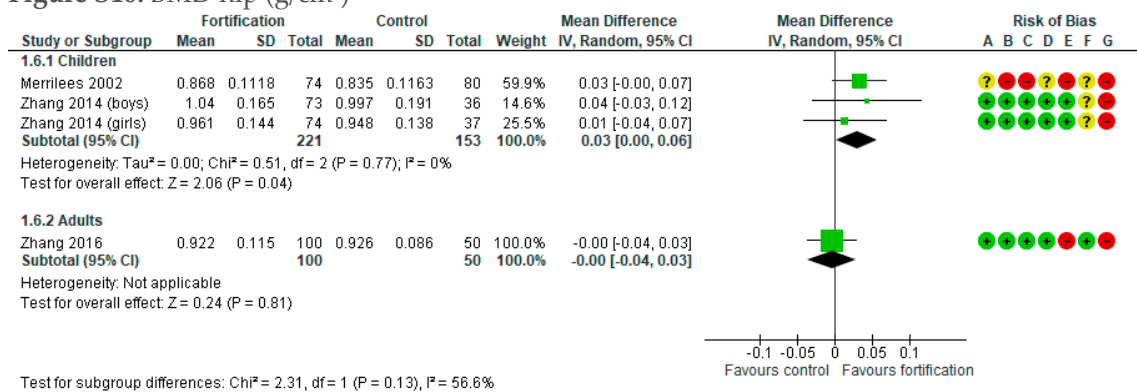

Figure S11: BMD Hip (g/cm<sup>2</sup>)

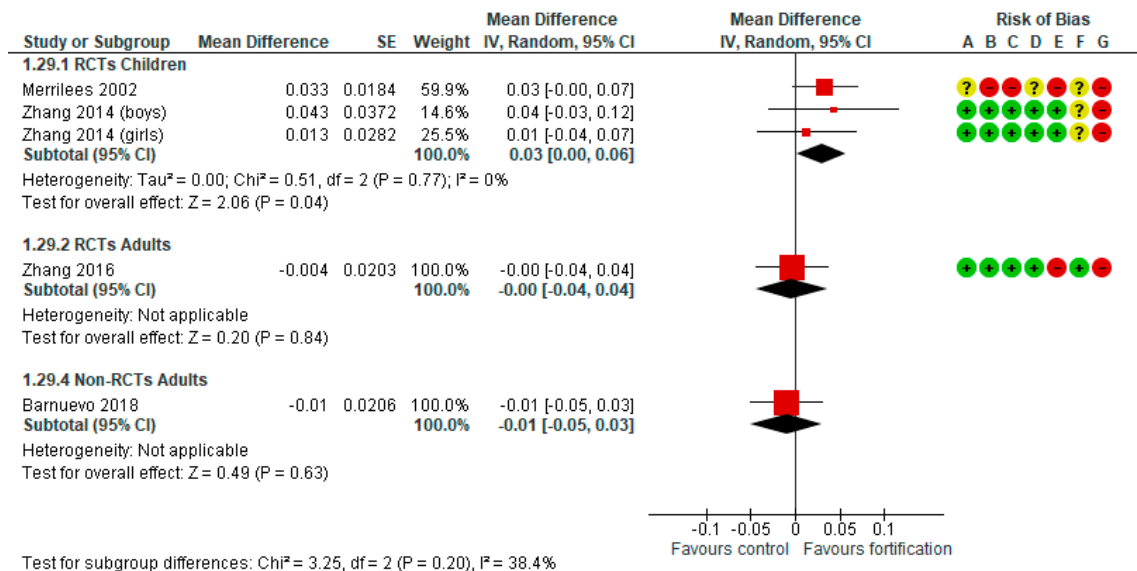

Figure S12: BMD total body (g/cm<sup>2</sup>)

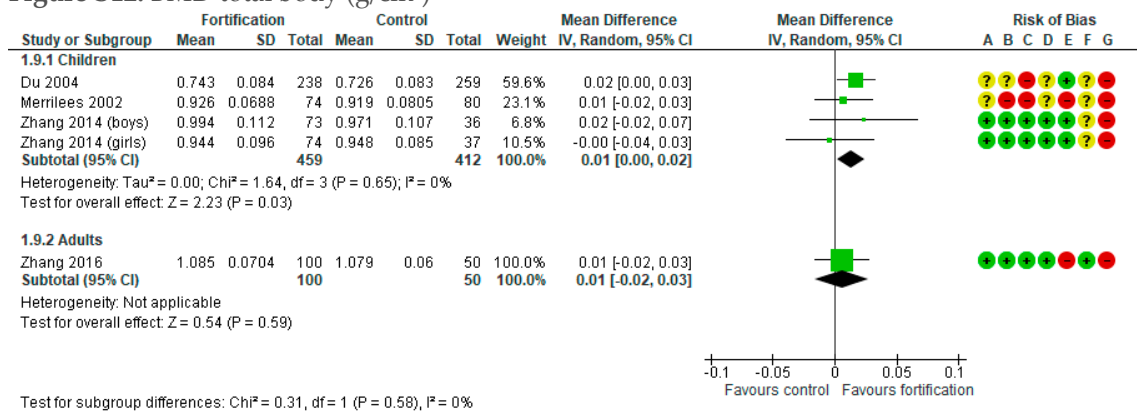

Figure S13: BMC total body (g)

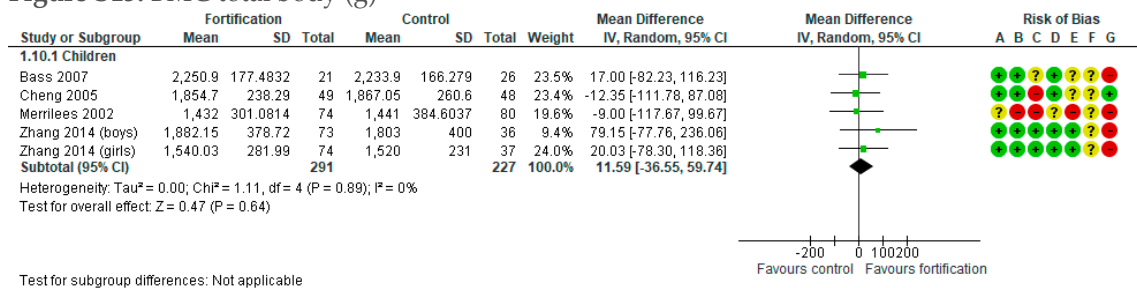

Figure S14: BMC lumbar spine (g)

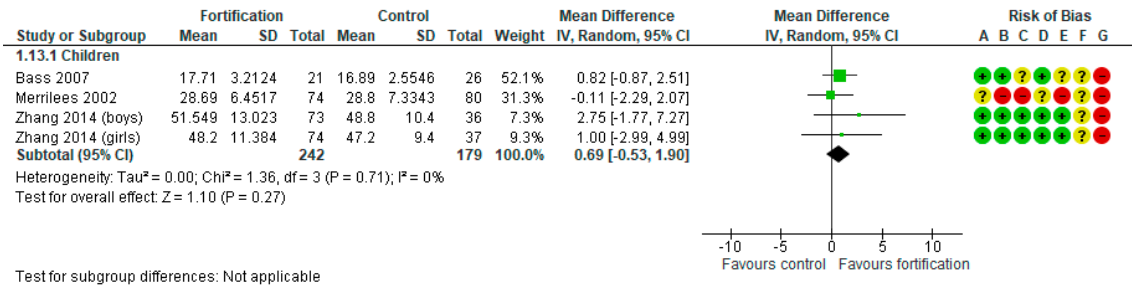

Figure S15: BMD Trochanteric region (g/cm<sup>2</sup>)

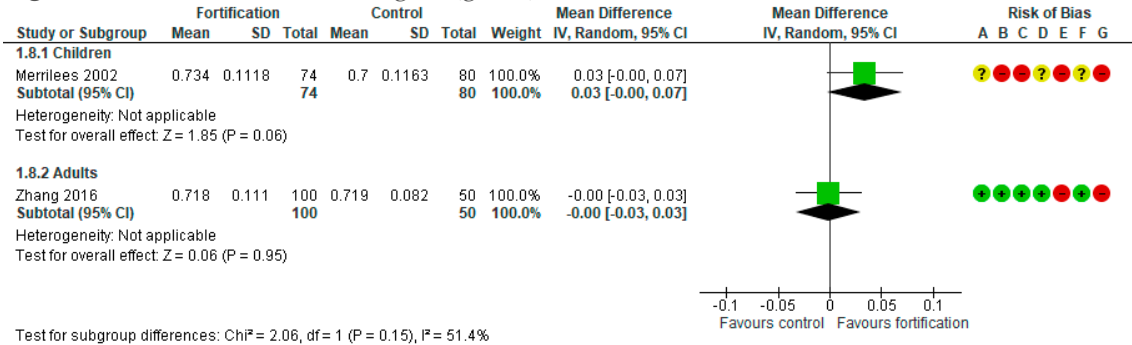

Figure S16: BMD Trochanteric region (g/cm<sup>2</sup>)

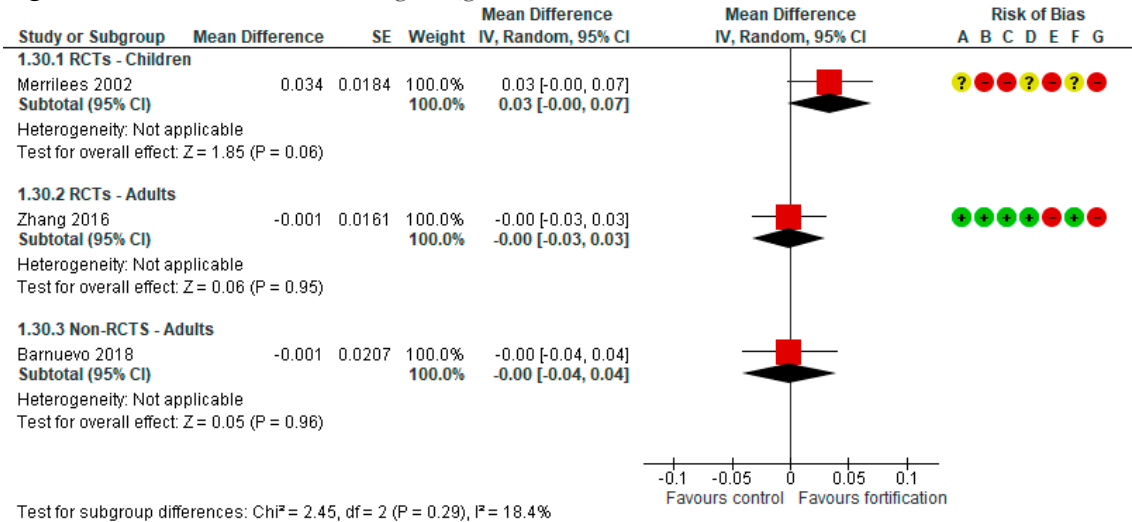

Figure S17: Calcium Intake (mg/day)

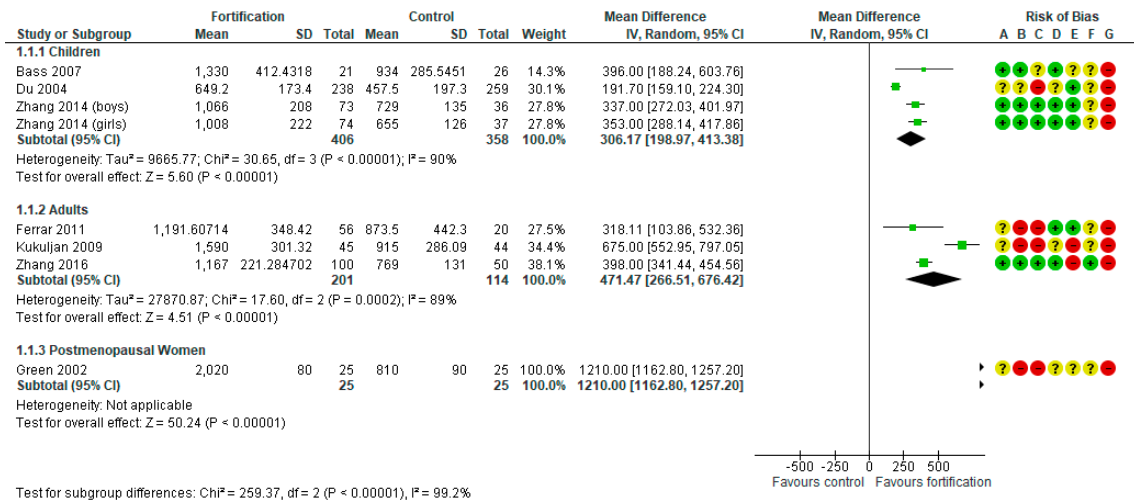

**Figure S18: BMD Femoral neck (g/cm<sup>2</sup>)**

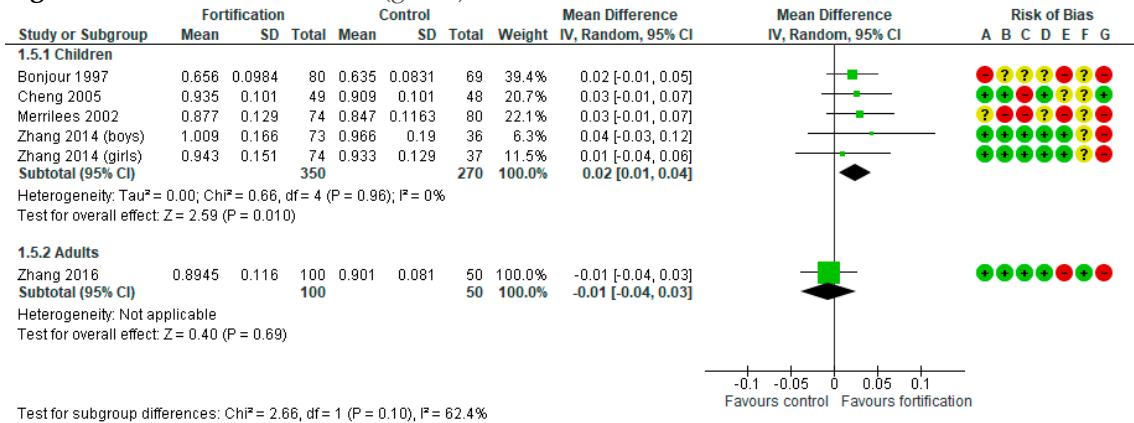

**Figure S19: Body Mass Index (kg/m<sup>2</sup>)**

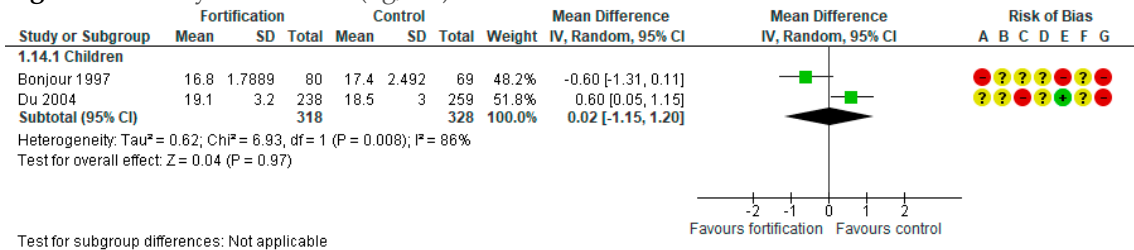

**Figure S20: BMC Hip (g)**

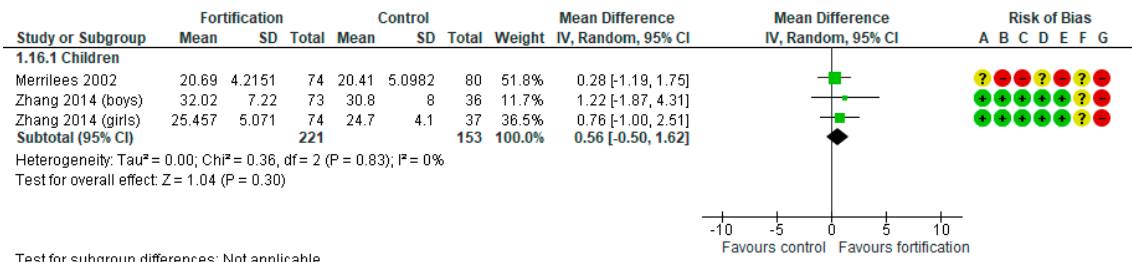

**Figure S21: BMC Femoral Neck (g)**

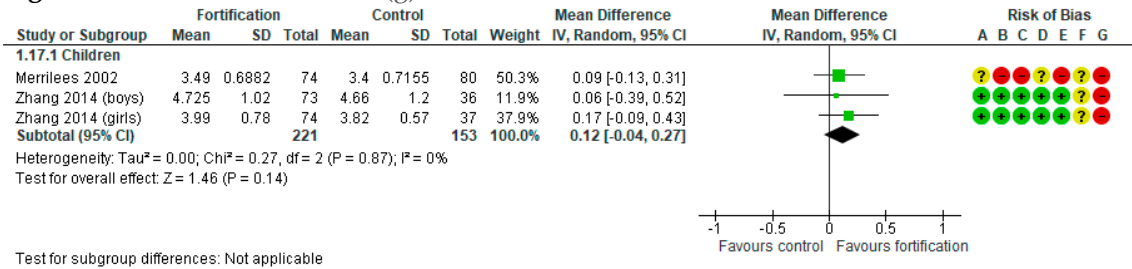

**Figure S22: BMC Femoral Shaft (g)**

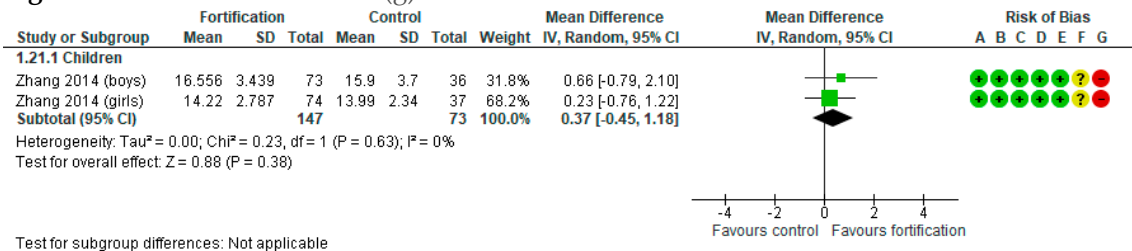

**Figure S23: BMD Femoral Shaft (g/cm<sup>2</sup>)**

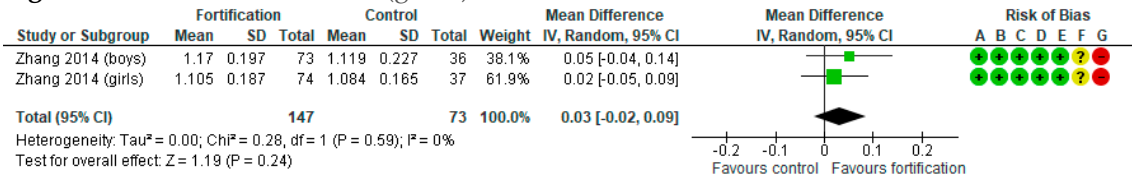

**Figure S24: Parathyroid hormone by calcium fortification level (pmol/L)**



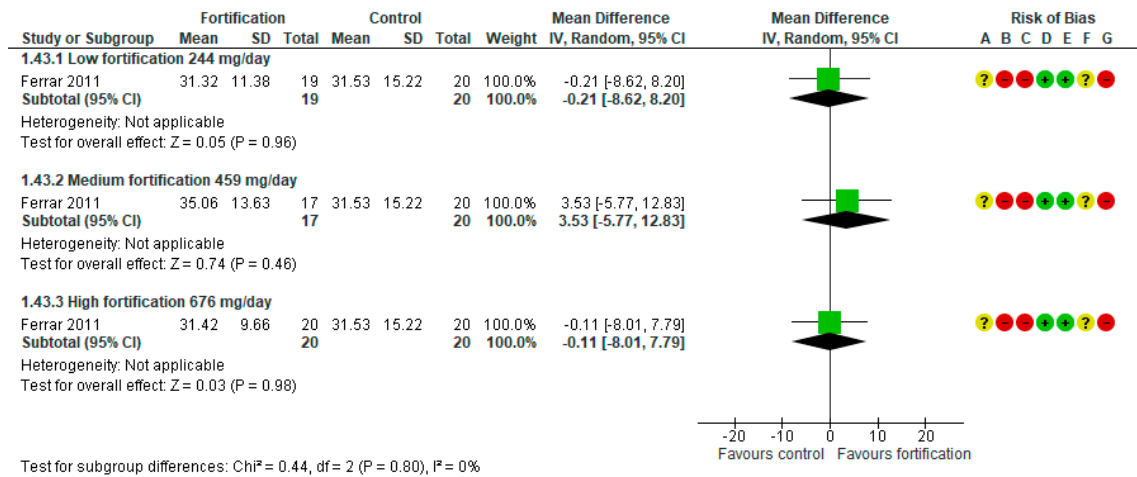

**Figure S25: Serum 1,25-dihydroxycholecalciferol by calcium fortification level (nmol/l)**

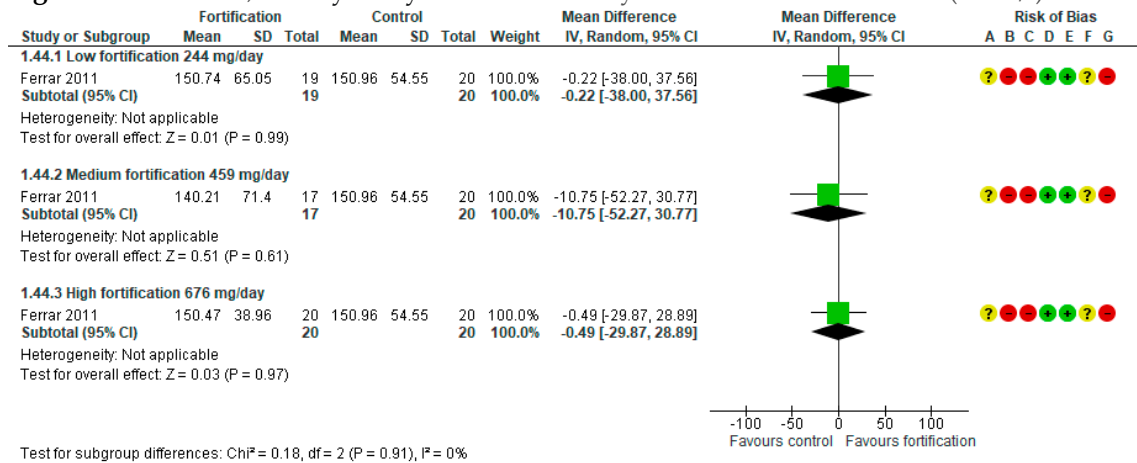

**Figure S26: BMD Lumbar spine by calcium fortification level (g/cm<sup>2</sup>)**

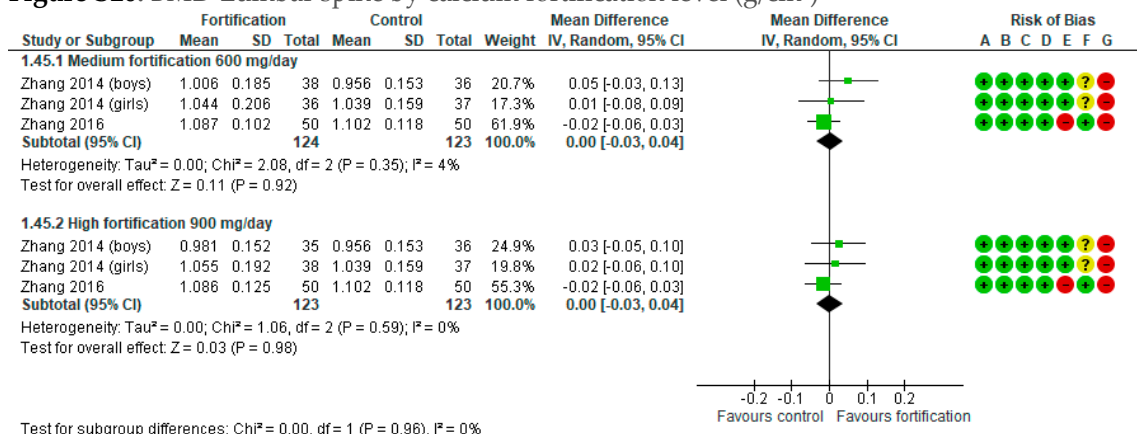

**Figure S27: Weight by calcium fortification level (Kg)**

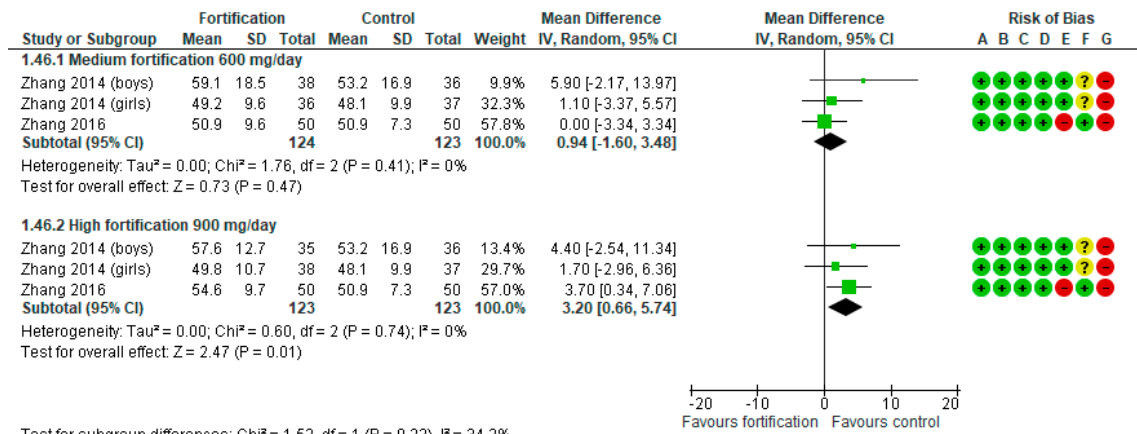

Figure S28: BMD Femoral neck by calcium fortification level (g/cm<sup>2</sup>)

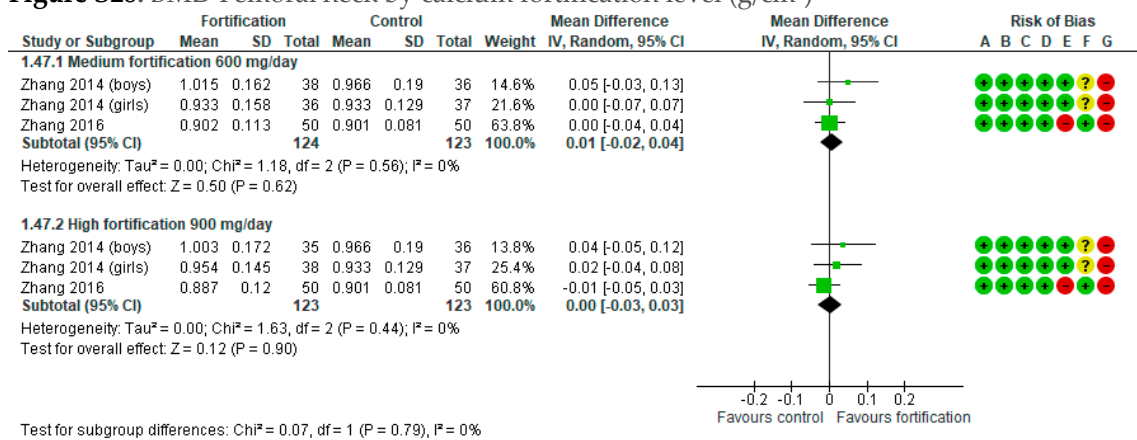

Figure S29: BMD hip by calcium fortification level (g/cm<sup>2</sup>)

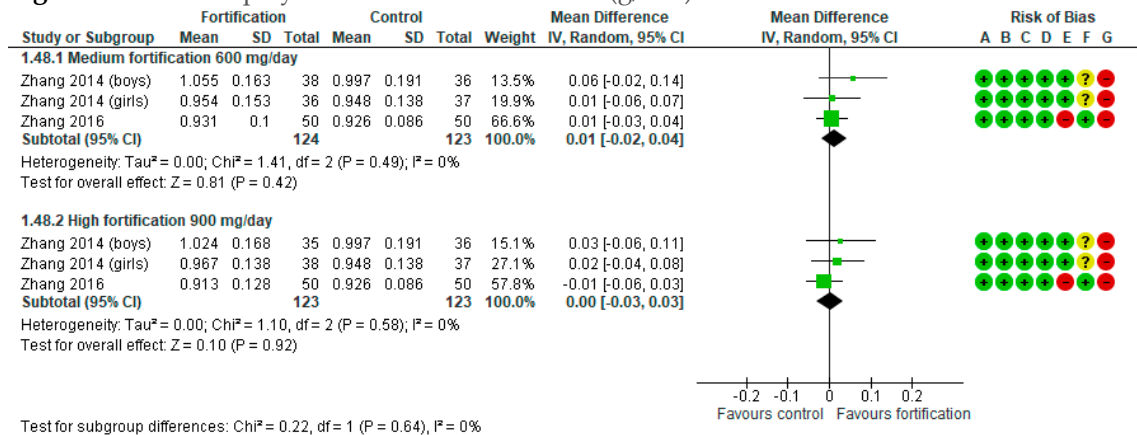

Figure S30: BMD total body by calcium fortification level (g/cm<sup>2</sup>)

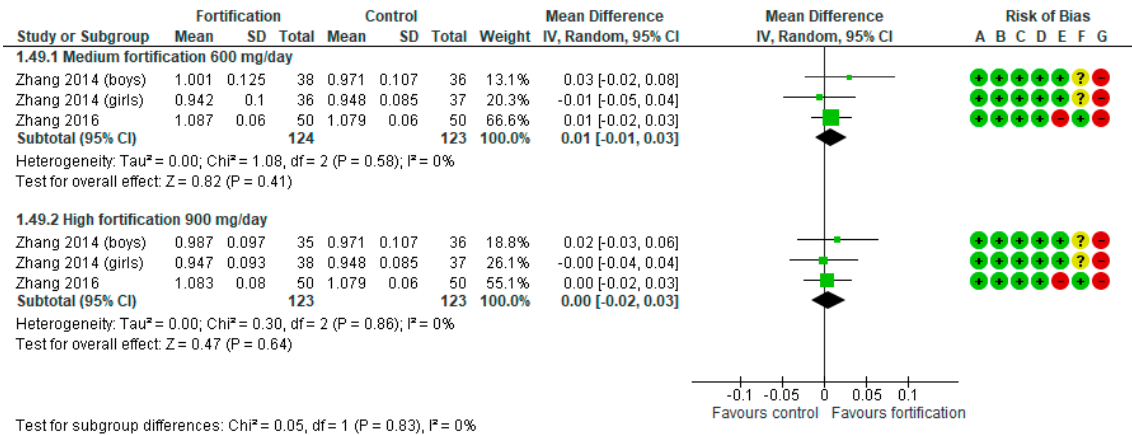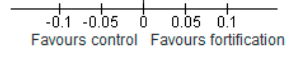

Supplement: s1 [file s1]
